# Supplementary material for: Changing Face of Inflammatory Activation in Complex Coronary Artery Disease during the COVID-19 Pandemic
Source: MDPI journal article supplement (doi:10.3390/jcdd10050199), 2023-04-30
Supplement: s1 [file s1]

# Supplementary Materials

**Table S1.** Uni- and multivariable analysis for 12-month mortality prediction in pre-COVID and post-COVID group (performed separately).

| Parameters           | Pre- COVID           |              |           |                        |             |           | Post-COVID           |              |           |                        |        |           |
|----------------------|----------------------|--------------|-----------|------------------------|-------------|-----------|----------------------|--------------|-----------|------------------------|--------|-----------|
|                      | Univariable Analysis |              |           | Multivariable Analysis |             |           | Univariable Analysis |              |           | Multivariable Analysis |        |           |
|                      | HR                   | 95% CI       | p - value | HR                     | 95% CI      | p - value | HR                   | 95% CI       | p - value | HR                     | 95% CI | p - value |
| Demographical:       |                      |              |           |                        |             |           |                      |              |           |                        |        |           |
| Sex                  | 0.95                 | 0.42 – 2.07  | 0.849     | -                      | -           | -         | 0.51                 | 0.09 – 2.62  | 0.418     | -                      | -      | -         |
| Age                  | 1.04                 | 0.99 – 1.08  | 0.052     | -                      | -           | -         | 1.04                 | 0.93 – 1.16  | 0.516     | -                      | -      | -         |
| BMI                  | 1.08                 | 0.99 – 1.17  | 0.066     | -                      | -           | -         | 1.14                 | 0.94 – 1.39  | 0.190     | -                      | -      | -         |
| Clinical:            |                      |              |           |                        |             |           |                      |              |           |                        |        |           |
| HA                   | 1.17                 | 0.57 – 2.42  | 0.670     | -                      | -           | -         | 1.97                 | 0.24 – 16.36 | 0.531     | -                      | -      | -         |
| DM                   | 1.34                 | 0.82 – 5.28  | 0.337     | -                      | -           | -         | 0.71                 | 0.14 – 3.69  | 0.687     | -                      | -      | -         |
| COPD                 | 2.08                 | 0.95 – 1.61  | 0.121     | -                      | -           | -         | 2.26                 | 0.27 – 18.83 | 0.449     | -                      | -      | -         |
| PAD                  | 1.73                 | 0.91 – 3.28  | 0.093     | -                      | -           | -         | 1.22                 | 0.15 – 10.18 | 0.851     | -                      | -      | -         |
| Stroke               | 3.20                 | 0.99 – 10.31 | 0.051     | -                      | -           | -         | 1.66                 | 0            | 1.00      | -                      | -      | -         |
| Kidney failure       | 0.74                 | 0.10 - 5.35  | 0.763     | -                      | -           | -         | 3.26                 | 0.39 – 27.14 | 0.274     | -                      | -      | -         |
| Hypercholesterolemia | 1.07                 | 0.60 – 1.89  | 0.819     | -                      | -           | -         | 1.24                 | 0.28 – 5.55  | 0.777     | -                      | -      | -         |
| Preoperative         |                      |              |           |                        |             |           |                      |              |           |                        |        |           |
| LV ejection fraction | 0.98                 | 0.95 – 1.01  | 0.148     | -                      | -           | -         | 0.96                 | 0.91 – 1.02  | 0.211     | -                      | -      | -         |
| Laboratory           |                      |              |           |                        |             |           |                      |              |           |                        |        |           |
| (Whole blood count): |                      |              |           |                        |             |           |                      |              |           |                        |        |           |
| WBC                  | 1.09                 | 1.04 – 1.15  | <0.001    | -                      | -           | -         | 1.04                 | 0.72 – 1.50  | 0.826     | -                      | -      | -         |
| Lymphocytes          | 1.10                 | 1.04 – 1.17  | 0.002     | 1.1                    | 1.03 – 1.17 | 0.002     | 1.19                 | 0.46 – 3.09  | 0.714     | -                      | -      | -         |
| Neutrophils          | 1.13                 | 1.00 – 1.28  | 0.049     | -                      | -           | -         | 1.07                 | 0.68 – 1.67  | 0.777     | -                      | -      | -         |
| Monocytes            | 1.01                 | 0.50 – 2.03  | 0.980     | -                      | -           | -         | 0.03                 | 0.00 – 4.51  | 0.166     | -                      | -      | -         |
| Hemoglobin           | 0.89                 | 0.79 – 1.02  | 0.100     | -                      | -           | -         | 0.97                 | 0.73 – 1.29  | 0.823     | -                      | -      | -         |
| Hematocrit           | 0.89                 | 0.79 – 1.02  | 0.093     | -                      | -           | -         | 0.99                 | 0.96 – 1.03  | 0.750     | -                      | -      | -         |

|                                       |       |             |       |   |   |   |      |               |       |   |   |   |
|---------------------------------------|-------|-------------|-------|---|---|---|------|---------------|-------|---|---|---|
| Platelets                             | 1.00  | 0.99 – 1.00 | 0.889 | - | - | - | 1.01 | 0.99 – 1.01   | 0.112 | - | - | - |
| NLR                                   | 1.04  | 0.92 – 1.17 | 0.552 | - | - | - | 0.89 | 0.49 – 1.61   | 0.715 | - | - | - |
| MLR                                   | 0.926 | 0.33 – 2.58 | 0.883 | - | - | - | 0.00 | 0.00 – 1.93   | 0.068 | - | - | - |
| SII                                   | 1.00  | 0.99 – 1.01 | 0.295 | - | - | - | 1.00 | 0.99 – 1.00   | 0.496 | - | - | - |
| SIRI                                  | 1.04  | 0.98 – 1.12 | 0.155 | - | - | - | 0.52 | 0.15 – 1.79   | 0.297 | - | - | - |
| AISI                                  | 1.00  | 1.00 – 1.00 | 0.102 | - | - | - | 1.00 | 1.00 – 1.00   | 0.876 | - | - | - |
| MPV                                   | 0.97  | 0.81 – 1.17 | 0.780 | - | - | - | 1.05 | 0.59 – 1.85   | 0.871 | - | - | - |
| RDW                                   | 0.75  | 0.55 – 1.01 | 0.062 | - | - | - | 1.02 | 0.46 – 2.26   | 0.970 | - | - | - |
| <hr/>                                 |       |             |       |   |   |   |      |               |       |   |   |   |
| Laboratory<br>(myocardial markers):   |       |             |       |   |   |   |      |               |       |   |   |   |
| Troponin I                            | 0.59  | 0.07 – 5.41 | 0.644 | - | - | - | 0.46 | 0.00 – 436.73 | 0.824 | - | - | - |
| <hr/>                                 |       |             |       |   |   |   |      |               |       |   |   |   |
| Laboratory<br>(liver function tests): |       |             |       |   |   |   |      |               |       |   |   |   |
| AST                                   | 0.99  | 0.97 – 1.00 | 0.084 | - | - | - | 0.99 | 0.96 – 1.03   | 0.718 | - | - | - |
| ALT                                   | 0.99  | 0.99 – 1.01 | 0.738 | - | - | - | 1.02 | 0.96 – 1.07   | 0.562 | - | - | - |
| <hr/>                                 |       |             |       |   |   |   |      |               |       |   |   |   |
| Laboratory<br>(lipid profile):        |       |             |       |   |   |   |      |               |       |   |   |   |
| Total cholesterol                     | 0.79  | 0.56 – 1.11 | 0.171 | - | - | - | 0.93 | 0.48 – 1.79   | 0.816 | - | - | - |
| HDL                                   | 0.73  | 0.32 – 1.66 | 0.454 | - | - | - | 0.13 | 0.01 – 2.32   | 0.166 | - | - | - |
| LDL                                   | 0.95  | 0.69 – 1.31 | 0.758 | - | - | - | 0.93 | 0.41 – 2.10   | 0.857 | - | - | - |
| <hr/>                                 |       |             |       |   |   |   |      |               |       |   |   |   |
| No of performed grafts:               | 0.99  | 0.66 – 1.49 | 0.982 | - | - | - | 1.09 | 0.47 – 2.52   | 0.847 | - | - | - |

Abbreviations: AISI – aggregate index of systemic inflammation, ALT – alanine aminotransferase, AST – aspartate aminotransferase, BMI – body mass index, CI – confidence interval, COPD – chronic obstructive pulmonary disease, DM – diabetes mellitus, HA- arterial hypertension, HDL – high density lipoprotein cholesterol, HR – hazard ratio, LDL – low density lipoprotein cholesterol, LV- left ventricular, MLR – monocyte to lymphocyte ratio, MPV – mean platelets volume, NLR – neutrophil to lymphocyte ratio, PAD – peripheral artery disease, RDW – red cells distribution width, SII – systemic inflammatory index, SIRI – systemic inflammatory response index, WBC – white blood cells, \* statistically significant.
